# Supplementary material for: Identification and Verification of Five Potential Biomarkers Related to Skin and Thermal Injury Using Weighted Gene Co-Expression Network Analysis
Source: Front Genet. 2022 Jan 3;12:781589. doi: 10.3389/fgene.2021.781589 (PMC8762241; doi:10.3389/fgene.2021.781589)
Supplement: Supplementary file 6 [file DataSheet1.ZIP › Table1-The GEO sample information.xlsx]

## Sheet: Sheet2
Tissue	Dataset ID	GPL ID	No. of samples	Dataset Type	PMID	Organism
Skin	GSE8056	GPL570	9 Burn , 3 Normal	Microarray	19781859	Homo sapiens
Skin	GSE139028	GPL15433	6 Burn , 3 Normal	RNA-Seq	32482377	Homo sapiens
Blood	GSE19743	GPL570	114 Burn , 63 Normal	Microarray	20479259	Homo sapiens
Blood	GSE37069	GPL570	553 Burn , 37 Normal	Microarray	25253675	Homo sapiens
